# Supplementary material for: Edge-decorated graphene nanoribbons by scandium as hydrogen storage media
Source: Royal Society of Chemistry journal article supplement (doi:10.1039/c2nr11257d), 2012-01-01

## Supplementary Information

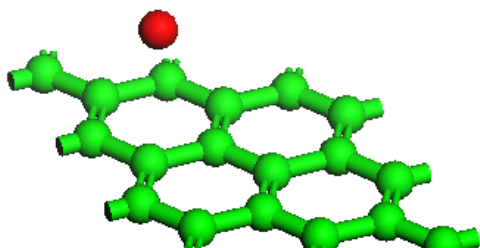

**Table S1.** Calculated binding energy of a metal atom (red sphere) located on the center of a hexagon of the graphene. Optimization of the structure is at the GGA/PBE level of theory.

|            | Li   | Na   | Mg   | Al   | Sc  | Ti   | V    | Cr   | Mn   | Fe   | Co   | Ni   | Cu   |
|------------|------|------|------|------|-----|------|------|------|------|------|------|------|------|
| $E_b$ (eV) | 0.97 | 0.82 | 0.17 | 1.00 | 2.1 | 1.32 | 1.40 | 0.27 | 0.29 | 0.52 | 0.57 | 0.88 | 0.22 |

**Figure S1.** A plot of the first, second, and third narrowest AGNRs and ZGNRs.

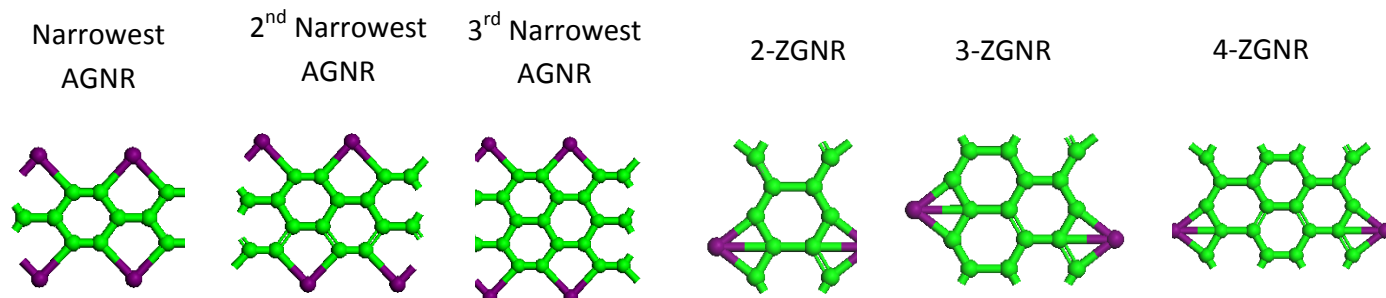

**Figure S2.** Snapshot of a Sc atom (per supercell), initially 4 Å away from an unpassivated edge of 2-ZGNR at 300 K (left panel). At the end of 0.2ps quantum molecular dynamics simulations the Sc atom binds to the edge of 2-ZGNR and the system become the 2-ZGNR>Sc/2 (right panel).

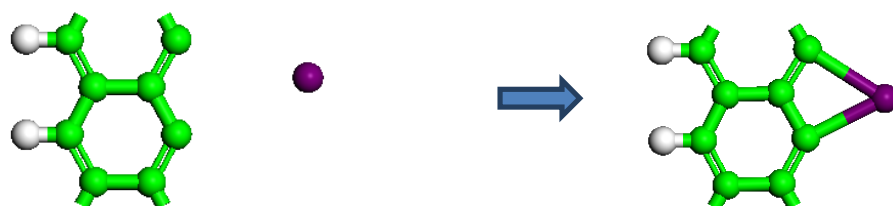

Supplement: c2nr11257d.pdf [file c2nr11257d.pdf]
